# Supplementary material for: Allopolyploidy: An Underestimated Driver in Juniperus Evolution
Source: MDPI journal article supplement (doi:10.3390/life13071479), 2023-06-30
Supplement: s1 [file s1]

# Supplementary Material

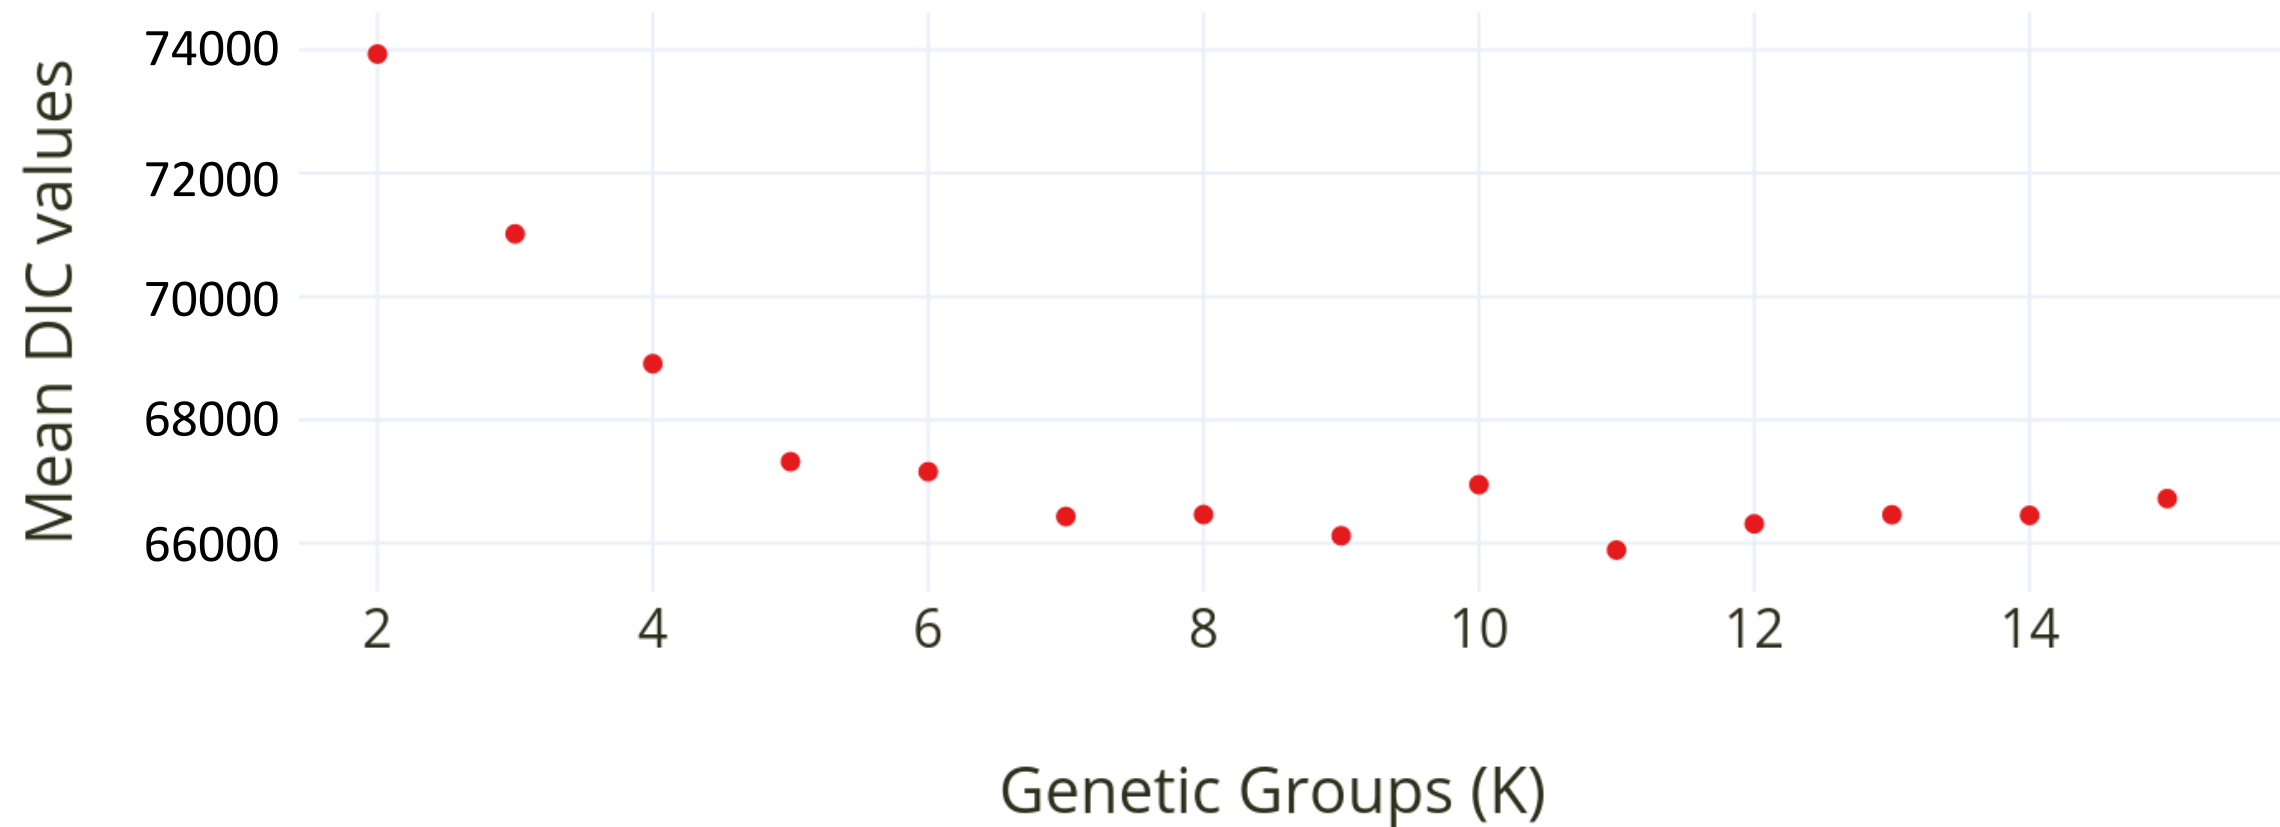

Figure S1. Plot of the Deviance Information Criteria (DIC) indicating the best genetic group (K) values for the studied AFLP markers data

## Solution-A

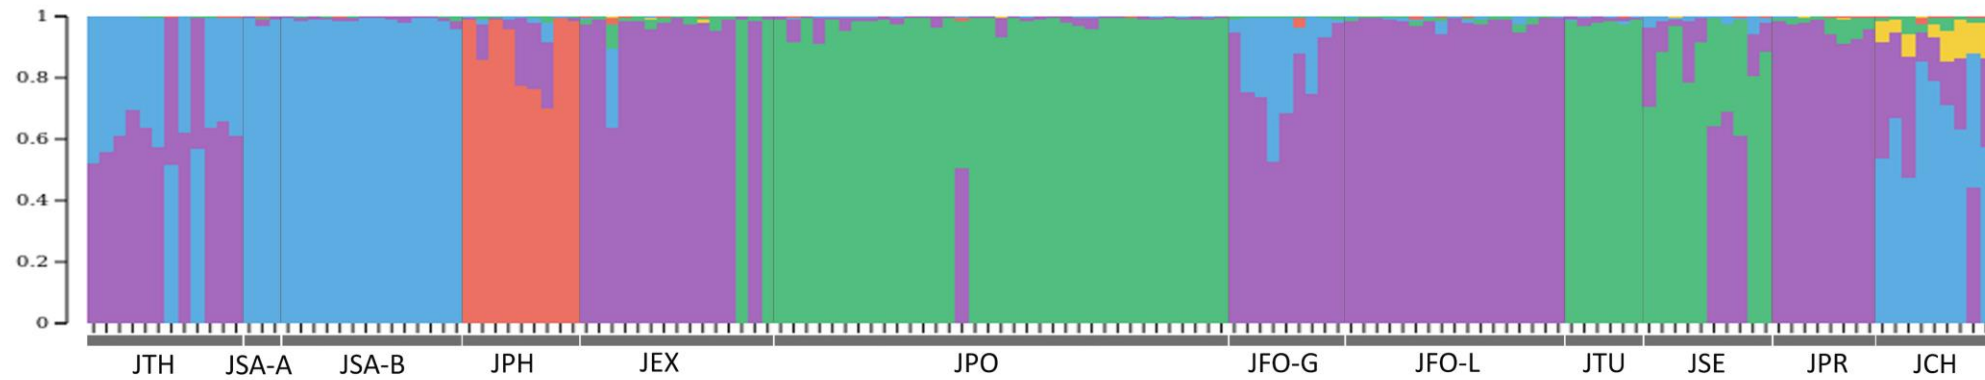

## Solution-B

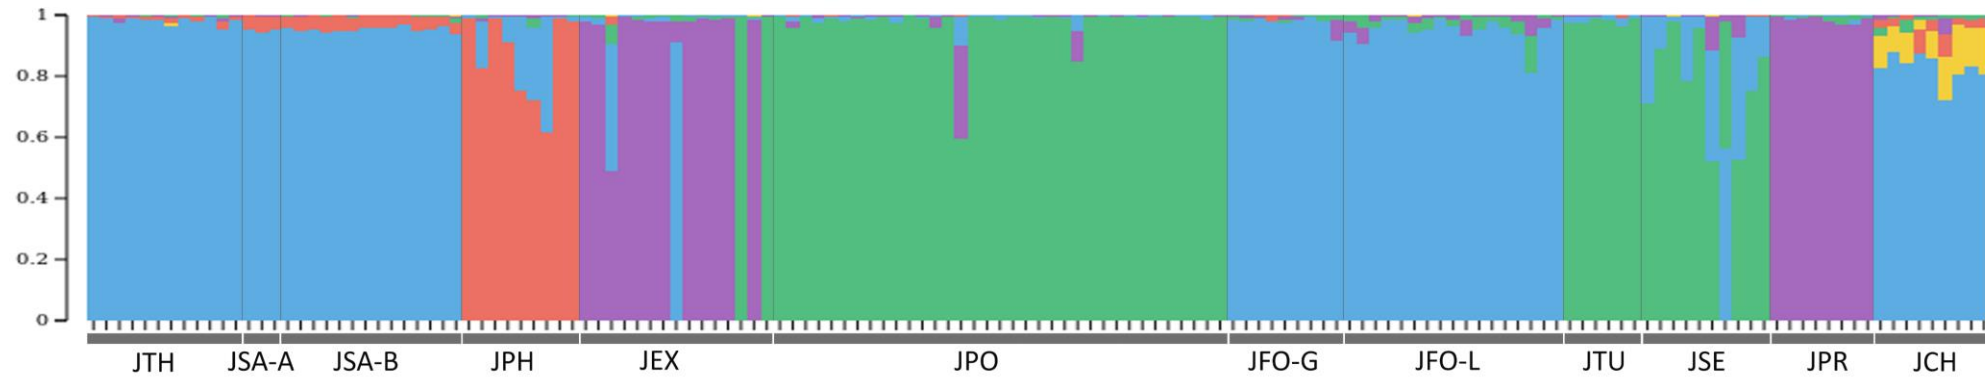

Figure S2. Plot of the Bayesian clustering analysis under the solutions A and B under the genetic group  $K = 5$ .

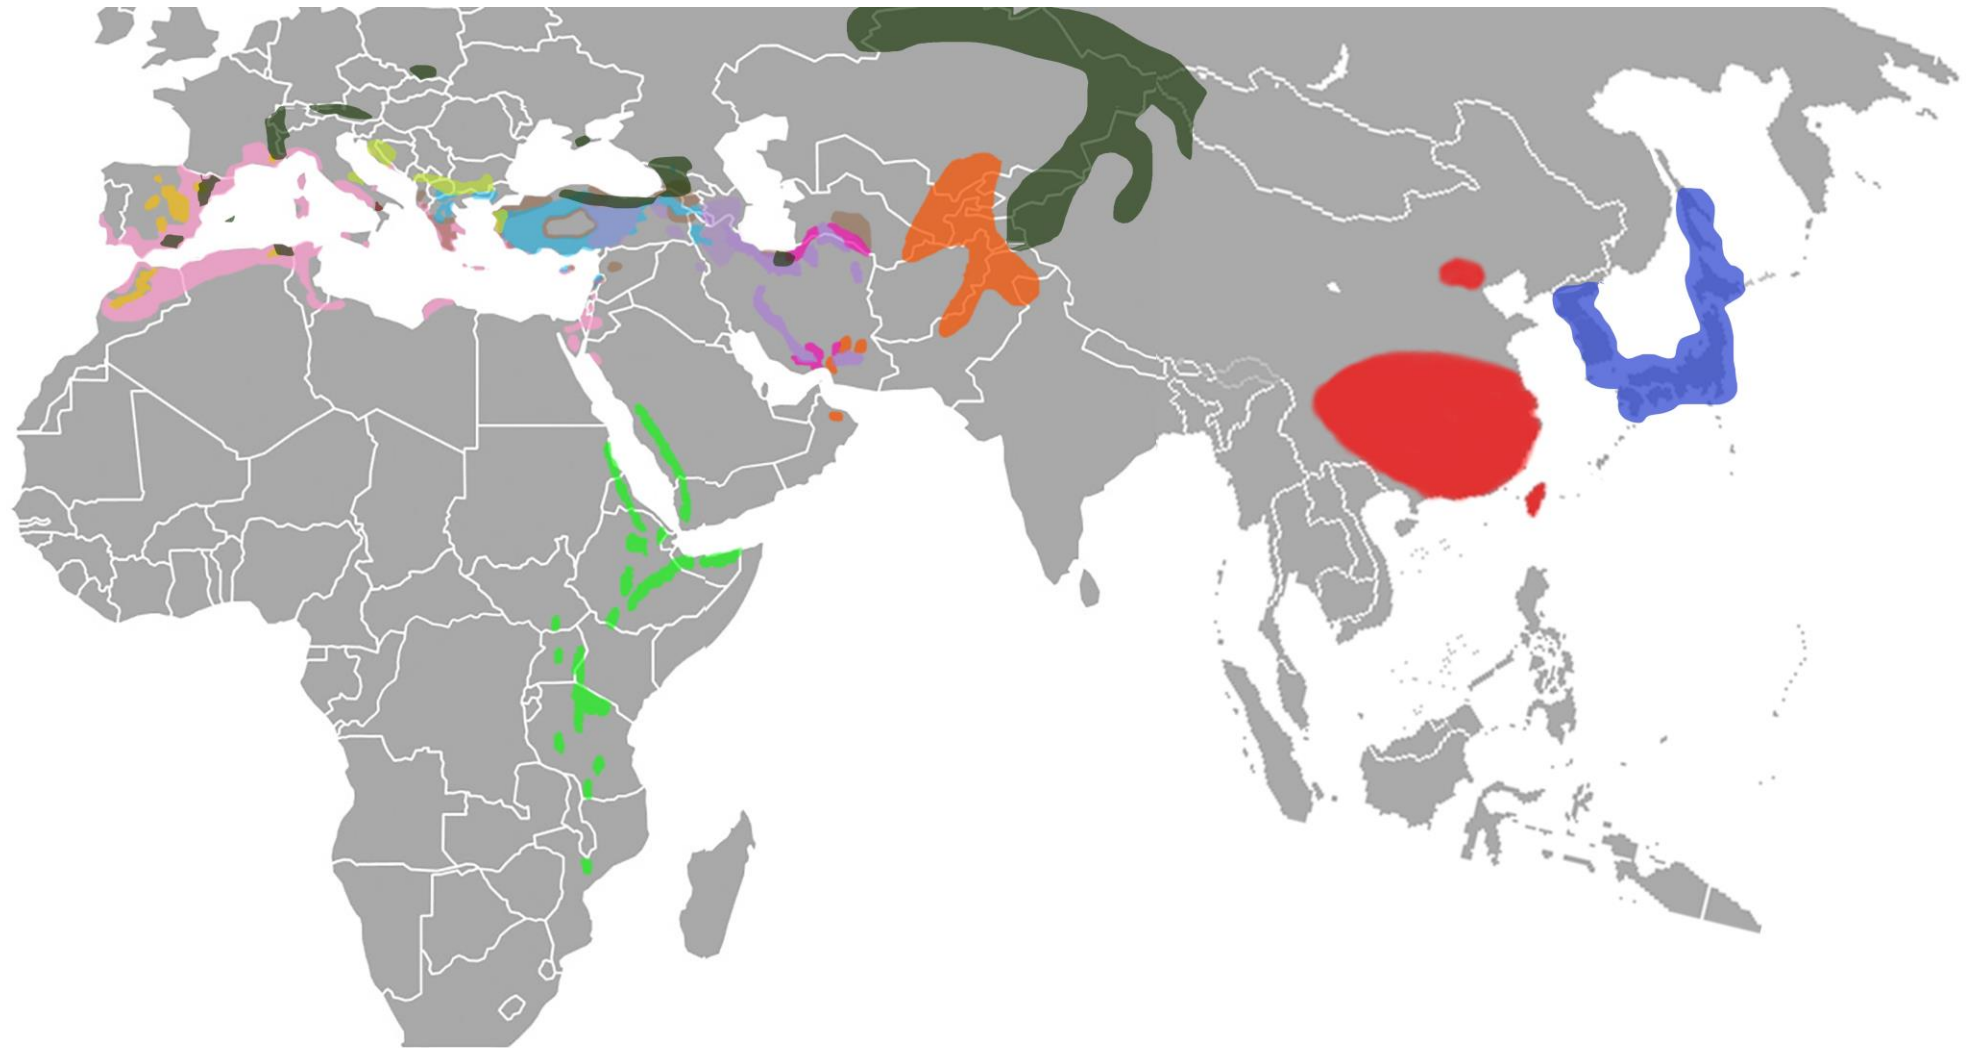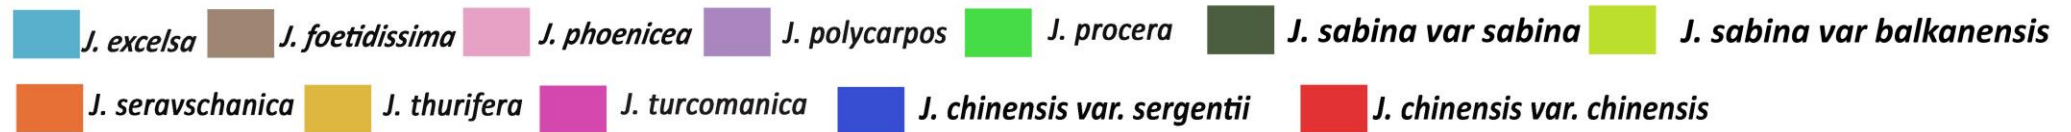

Figure S3. Geographical distribution of the studied *Juniperus* taxa extracted from (Adams 2014 and Farhat et al 2019).
